# Supplementary material for: Enhanced dielectric properties of amino-modified-CNT/polyimide composite films with a sandwich structure
Source: Royal Society of Chemistry journal article supplement (doi:10.1039/c4ta01818d), 2014-06-27
Supplement: c4ta01818d1.pdf [file c4ta01818d1.pdf]

## **Enhanced Dielectric Properties of Amino-Modified-CNT/Polyimide Composite Films with Sandwich Structure**

Yaqin Chen,<sup>a</sup> Baoping Lin,<sup>a\*</sup> Xueqin Zhang,<sup>a</sup> Junchuan Wang,<sup>a</sup> Changwei Lai,<sup>a</sup> Ying Sun,<sup>a</sup>  
Yurong Liu<sup>a,b</sup> and Hong Yang<sup>a</sup>

<sup>a</sup> School of Chemistry and Chemical Engineering, Southeast University, Nanjing 211189, China.

<sup>b</sup> Chongqing Key Laboratory of Micro/Nano Materials Engineering and Technology, Research Center for Material Interdisciplinary Science, Chongqing University of Arts and Science, Chongqing 402168, China.

E-mail: lbp@seu.edu.cn; Fax: +86 52090616; Tel: +86 136 01401581; +86 138 51439064

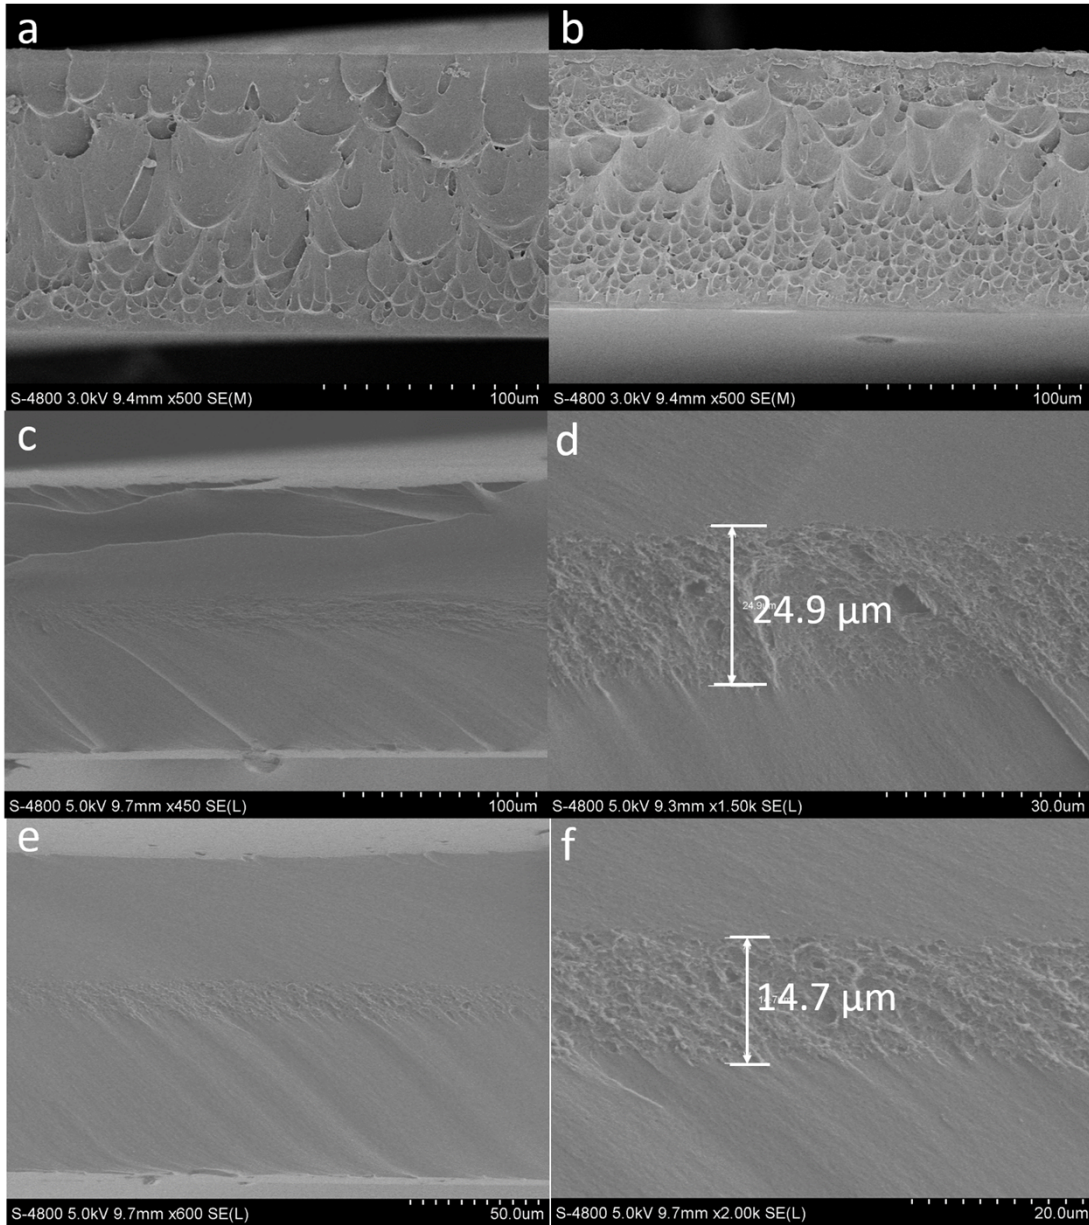

Figure S1. Cross-section SEM images of a) P-10-P, b) P-10-P<sub>5</sub>, c) P-10-P<sub>1</sub> and e) P-10-P<sub>100</sub>, d) is enlarged view of c), f) is enlarged view of e).

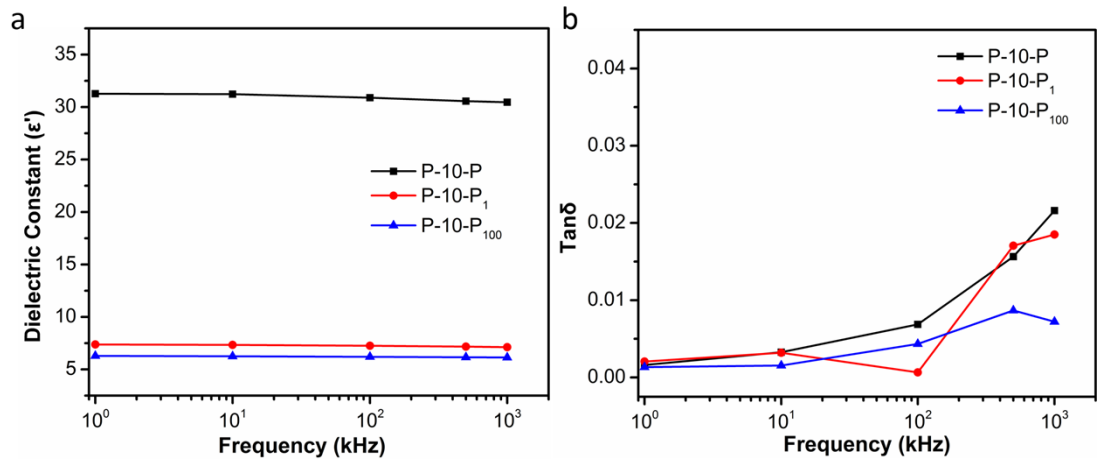

Figure S2. Frequency-dependent a) dielectric constant and b) dielectric loss of the multi-layer structure NH<sub>2</sub>-MWNT/PI composite films as a function of the thickness of the mid-layer.
